# Supplementary material
Source: publisher site journal article supplement (https://www.dovepress.com/article/412158)
Supplement: Supplementary file 1 [file get_supplementary_file.php]

# Supplementary Figures
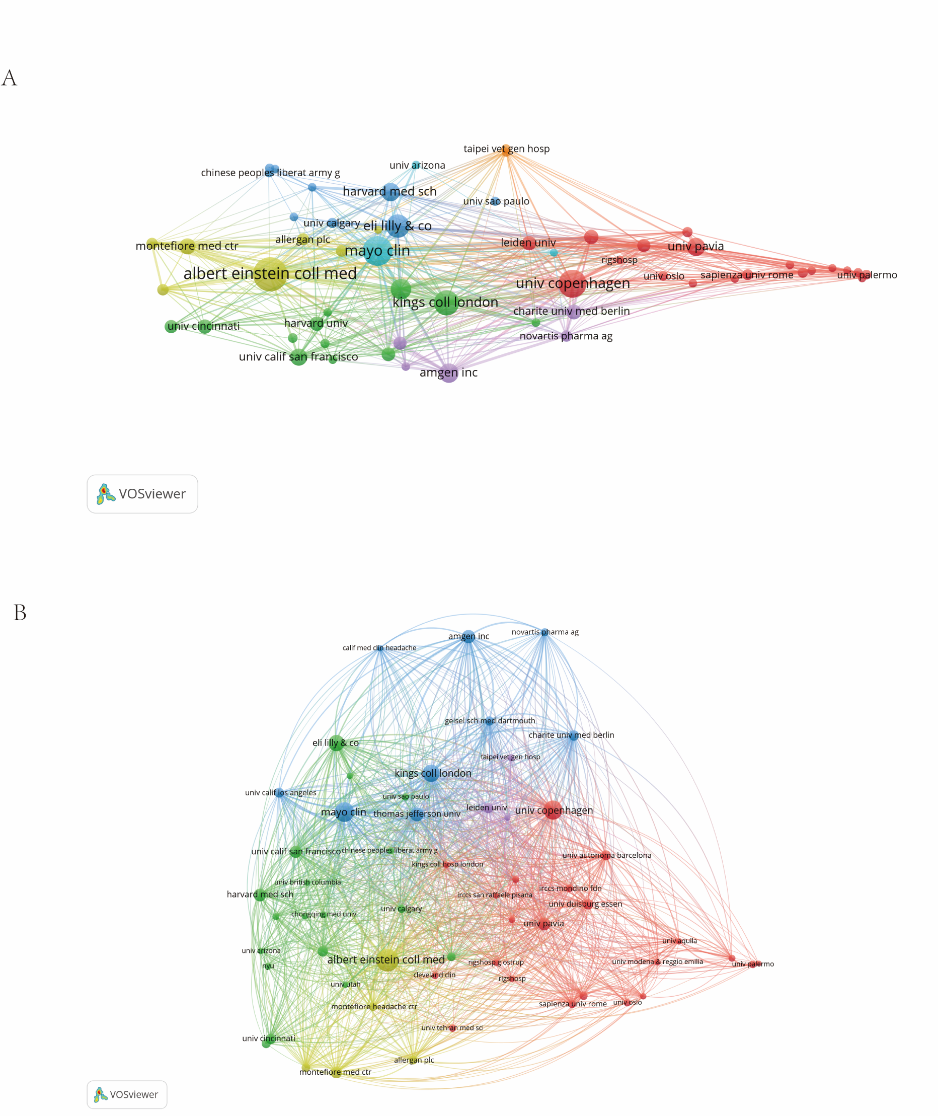


**Supplementary Figure 1.** (A) Co-authorship relationships between organizations. (B) Citation relationships between organizations. Top3 TLS was: Albert Einstein College Medicine (TLS=5,257), Mayo Clinic (TLS=4,637), and Kings College London (TLS=3,509).

**
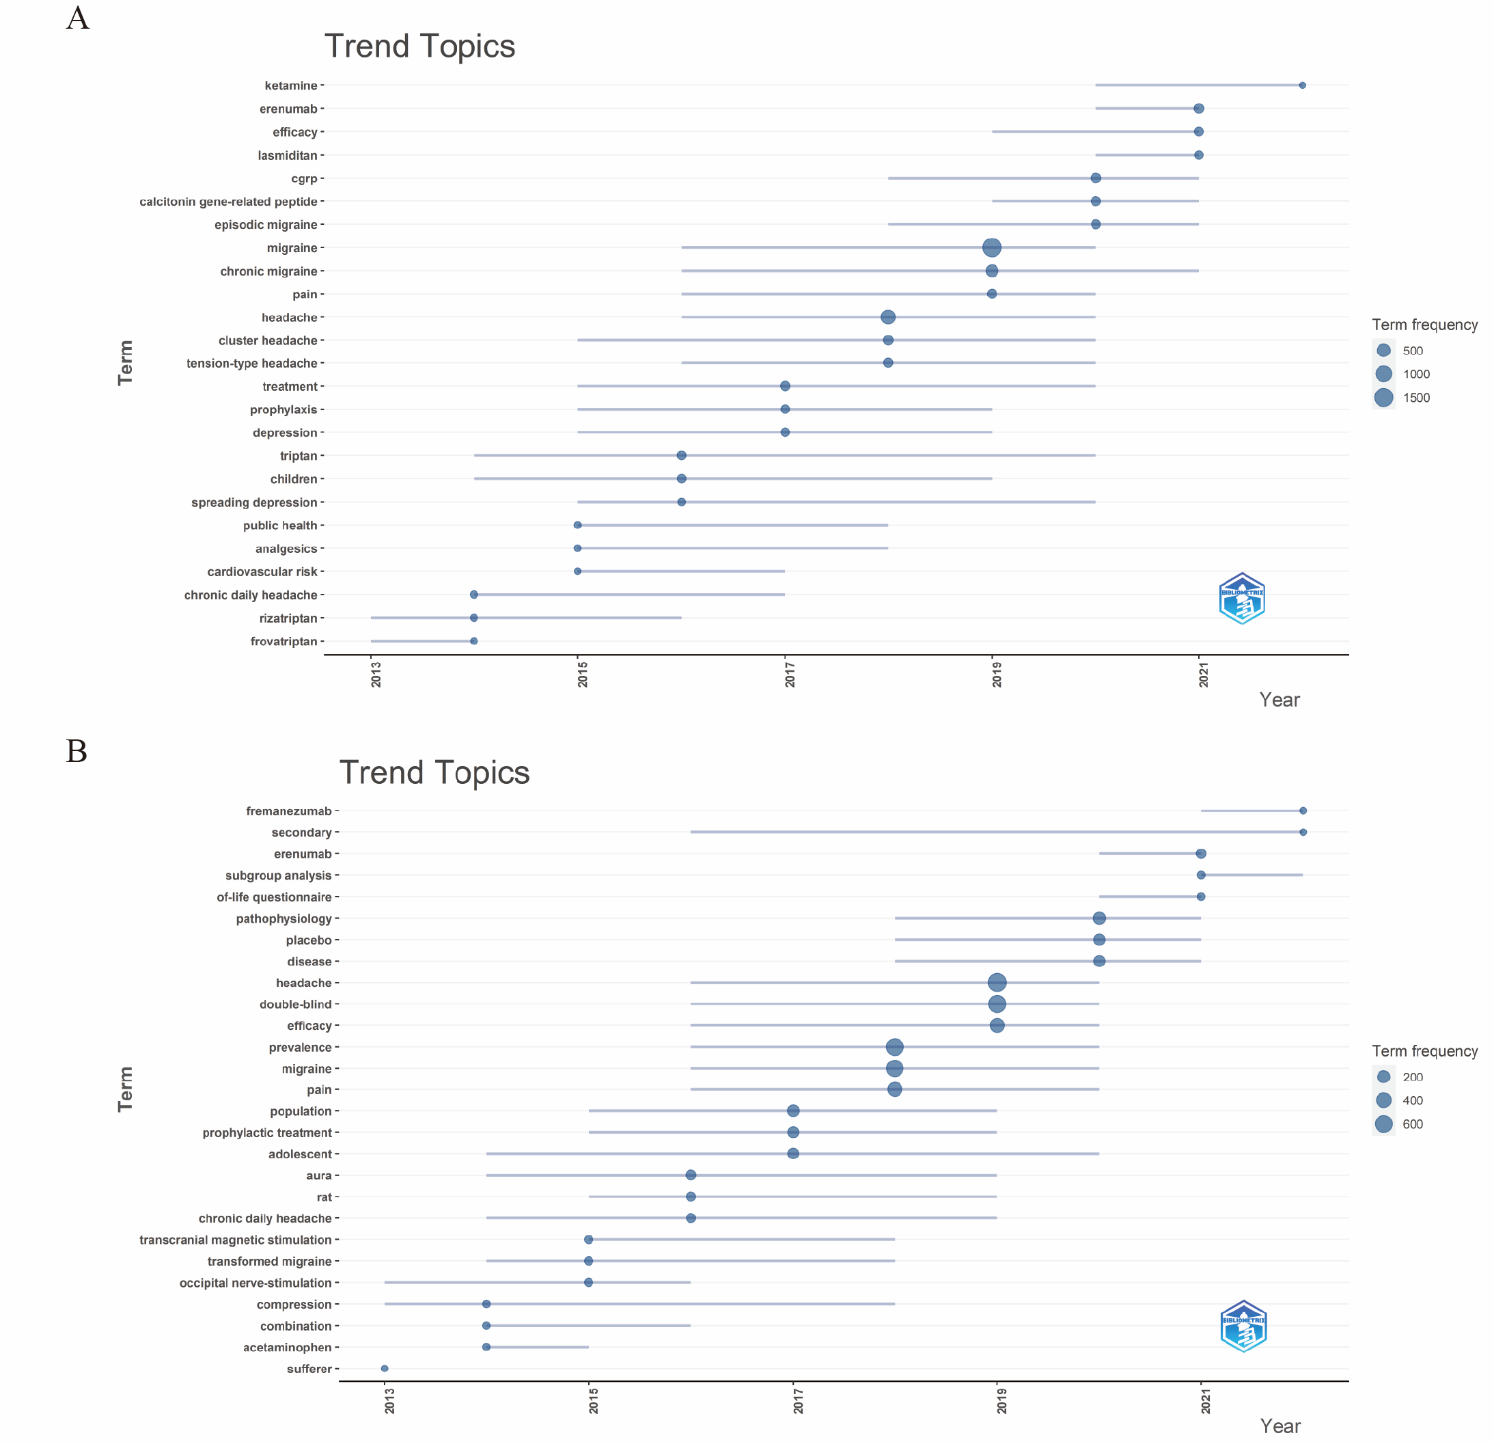
**

Supplementary Figure2 (A) Frequency of author keywords occurrence over time on migraine treatment. (B) Frequency of keywords plus occurrence over time.

# Supplementary Tables

**Supplementary Table 1.** The top 10 publications on migraine treatment with the most citations.

| Rank | **Paper** | **DOI** | **Total Citations** | **TC per Year** | **Normalized TC** |
| --- | --- | --- | --- | --- | --- |
| 1 | TEPPER S, 2017, LANCET NEUROL27 | 10.1016/S1474-4422(17)30083-2 | 392 | 65.33 | 18.05 |
| 2 | BURSTEIN R, 2015, J NEUROSCI28 | 10.1523/JNEUROSCI.0373-15.2015 | 385 | 48.13 | 13.17 |
| 3 | SILBERSTEIN SD, 2017, NEW ENGL J MED29 | 10.1056/NEJMoa1709038 | 366 | 61.00 | 16.85 |
| 4 | BURCH RC, 2015, HEADACHE48 | 10.1111/head.12482 | 327 | 40.88 | 11.18 |
| 5 | DODICK DW, 2014, LANCET NEUROL49 | 10.1016/S1474-4422(14)70128-0 | 318 | 35.33 | 12.14 |
| 6 | MARMURA MJ, 2015, HEADACHE50 | 10.1111/head.12499 | 313 | 39.13 | 10.70 |
| 7 | SIMPSON DM, 2016, NEUROLOGY51 | 10.1212/WNL.0000000000002560 | 281 | 40.14 | 11.77 |
| 8 | DIGRE KB, 2019, HEADACHE30 | 10.1111/head.13456 | 280 | 70.00 | 16.68 |
| 9 | DODICK DW, 2018, CEPHALALGIA52 | 10.1177/0333102418759786 | 278 | 55.60 | 12.22 |
| 10 | STAUFFER VL, 2018, JAMA NEUROL53 | 10.1001/jamaneurol.2018.1212 | 266 | 53.20 | 11.70 |
|  |  |  |  |  |  |

**Supplementary Table 2.** The 5 most frequently cited references from 2013 to 2022.

| Rank | **Cited References** | **Citations** |
| --- | --- | --- |
| 1 | SILBERSTEIN SD, 2004, CEPHALALGIA31 | 762 |
| 2 | BES A, 2013, CEPHALALGI54 | 596 |
| 3 | TORELLI P, 2004, CEPHALALGIA55 | 429 |
| 4 | LIPTON RB, 2007, NEUROLOGY56 | 359 |
| 5 | DIENER HC, 2010, CEPHALALGIA57 | 219 |
|  |  |  |

**Supplementary Table 3.** The 20 keywords with the largest TLS in the co-occurrence map.

| Rank | keyword | total link strength | occurrences |
| --- | --- | --- | --- |
| 1 | migraine | 7720 | 1894 |
| 2 | headache | 5743 | 1234 |
| 3 | double-blind | 3653 | 632 |
| 4 | prevalence | 3425 | 612 |
| 5 | chronic migraine | 2527 | 448 |
| 6 | efficacy | 2245 | 382 |
| 7 | disability | 2145 | 340 |
| 8 | episodic migraine | 2036 | 324 |
| 9 | cgrp | 2034 | 446 |
| 10 | burden | 1883 | 314 |
| 11 | pain | 1799 | 387 |
| 12 | safety | 1381 | 220 |
| 13 | onabotulinumtoxina | 1203 | 178 |
| 14 | management | 1167 | 234 |
| 15 | prevention | 1164 | 197 |
| 16 | quality-of-life | 1132 | 180 |
| 17 | tension-type headache | 1124 | 208 |
| 18 | placebo-controlled phase | 1101 | 156 |
| 19 | impact | 1088 | 182 |
| 20 | united-states | 1062 | 166 |
